# Supplementary material for: Anti-Proliferative Properties and Proapoptotic Function of New CB2 Selective Cannabinoid Receptor Agonist in Jurkat Leukemia Cells
Source: MDPI journal article supplement (doi:10.3390/ijms19071958), 2018-07-04
Supplement: s1 [file s1]

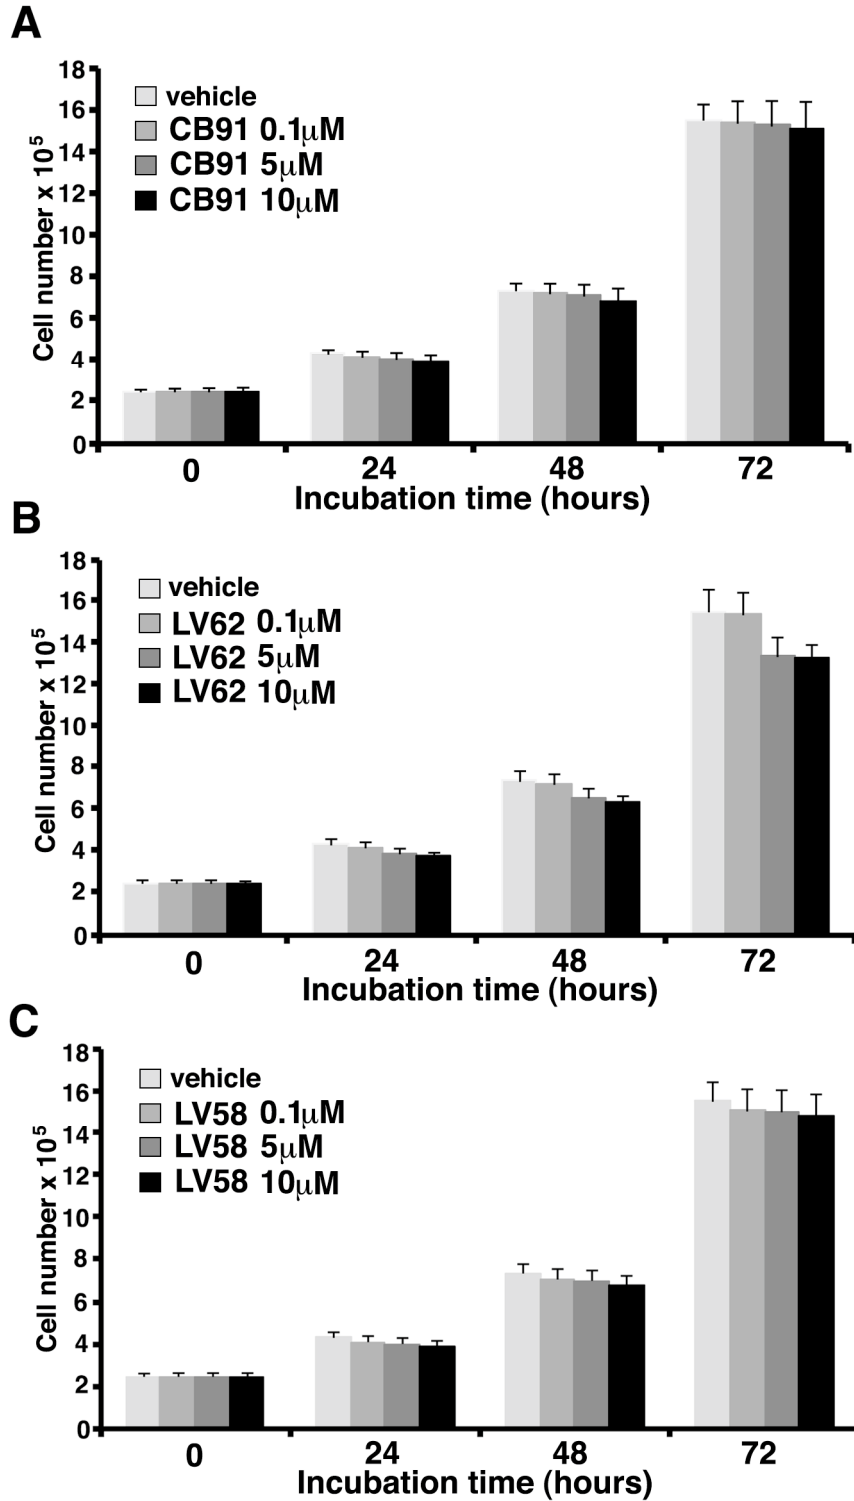

**Figure S1.** Trypan Blue exclusion test: CB91, LV62, and LV58 effect on cell viability. Jurkat cells were cultured with three different concentrations of the compound (0.1 $\mu$ M, 5  $\mu$ M, and 10  $\mu$ M) for 24, 48, and 72 h. The number of viable cells was determined by Trypan Blue exclusion test. Data are reported as the mean  $\pm$  SD among ten independent experiments. Statistical analysis indicated: treated versus vehicle. NS, not significant.
